# Supplementary material for: Leasing from the perspective of environmental management and its influence on business performance
Source: Frontiers journal article supplement (doi:10.3389/fenvs.2023.1272816), 2023-09-14
Supplement: Table_1.XLSX [file Table_1.XLSX]

## Sheet: RECAP_final
	1	0
									Balance sheet													Výsledovka							Annual Report			Securities market
									Total Assets							Lease DUMMY														Board size							FirmAge	Assets in Place					ROA	ROE	ROS	Lease Intensity	Leverage Ratio	Tobinovo Q	Market to Book
Index	Business name	Starting a business	Accounting period	Year	Company´s age	NACE codes	NACE classification of economic activities in the European Union (EU)	Lease Dummy	Net assets	Pozemky	Budovy	Stroje	ZÁSOBY	Tangible assets (fixed)	Leasing in total	Leasing Yes/No	Práva k užívání leasingu (operativní leasing)	Equity	Foreign capital	Účetní hodnota práv z FL	Diskontovaná hodnota budoucích platez z OL	Tržby z prodeje produktů a služeb	Tržby z prodeje zboží	Turnover	EBT	EAT	Other operating income	Sales	Number of employees	Board size	Operativní leasing	Number of shares outstanding	Marketable value of the share	Business’s Market Value	Business’s Market Value	Listing Age	Age of stocking	Assets in Place	Total assets	Turnover	Average number of employees	Business size	ROA	ROE	ROS	Lease Intensity	Leverage Ratio	Tobinovo Q	Market to Book
1	Kofola ČeskoSlovensko a.s.	2012-09-12	2019-12-31	2019	7.40556	11.07	Production of non-alcoholic beverages	0	6916438	3127018	0	0		3127018	465934	YES	419791	1513550	5402888	46143	408470	5827066	582401	6409467	398748	252695	75750	6485217	1991	6		22291948	280	6241745440	6.24175e+06	2015-10-01	4.31111	0.452114	Large-sized	Large-sized	Large-sized	Large-sized	0.0576522	0.263452	0.0614857	0.149003	0.781166	1.68362	4.12391
2	Kofola ČeskoSlovensko a.s.	2012-09-12	2018-12-31	2018	6.39167	11.07	Production of non-alcoholic beverages	0	6563030	2959954	0	0		2959954	143360	YES		1475246	5087784	143360	135778	5628627	530552	6159179	423644	339244	68041	6227220	1902	6		22291948	283	6308621284	6.30862e+06	2015-10-01	3.29722	0.451004	Large-sized	Large-sized	Large-sized	Large-sized	0.0645501	0.287168	0.068031	0.0484332	0.775219	1.73645	4.27632
3	Kofola ČeskoSlovensko a.s.	2012-09-12	2017-12-31	2017	5.37778	11.07	Production of non-alcoholic beverages	0	6578868	3384892	0	0		3384892	9761	YES		1973986	4604882	9761	9571	6409682	553596	6963278	266884	152195	127535	7090813	2182	6		22295000	419.4	9350523000	9350523	2015-10-01	2.28333	0.51451	Large-sized	Large-sized	Large-sized	Large-sized	0.0405669	0.135201	0.037638	0.0028837	0.699951	2.12125	4.73687
4	Kofola ČeskoSlovensko a.s.	2012-09-12	2016-12-31	2016	4.36389	11.07	Production of non-alcoholic beverages	0	8019883	3442624	0	0		3442624	15052	YES		2739468	5280415	15052	14622	6506401	492559	6998960	170400	83400	84491	7083451	2055	6		22295000	366.9	8.18004e+09	8.18004e+06	2015-10-01	1.26944	0.429261	Large-sized	Large-sized	Large-sized	Large-sized	0.0212472	0.0622019	0.0240561	0.00437225	0.658415	1.67838	2.98599
5	Kofola ČeskoSlovensko a.s.	2012-09-12	2015-12-31	2015	3.34722	11.07	Production of non-alcoholic beverages	0	8491014	3508993	0	0		3508993	282913	YES		2870202	5620812	282913	255220	6755305	401427	7156732	322261	229001	134544	7291276	1961	5		22295000	490	10924550000	10924550	2015-10-01	0.252778	0.41326	Large-sized	Large-sized	Large-sized	Large-sized	0.0379532	0.112278	0.0441982	0.0806251	0.661972	1.94857	3.8062
6	Avast Software s.r.o.	2009-08-09	2018-12-31	2018	9.53056	58.29	Other software releases	0	6.52592e+07	2224134	0	0		2224134	1.61081e+06	YES	1.56588e+06	2.02284e+07	4.50309e+07	0	0	1.81593e+07	0	1.81593e+07	4100045	5.38285e+06	6739.8	1.8166e+07	1581	13		914567949	81.5	7.45373e+10	7.45373e+07	2018-05-14	0.641667	0.0340815	Large-sized	Large-sized	Large-sized	Large-sized	0.062827	0.202688	0.225699	0.724242	0.69003	1.8322	3.68479
7	Avast Software s.r.o.	2009-08-09	2019-12-31	2019	10.5444	58.29	Other software releases	0	6.48295e+07	2.38652e+06	0	0		2.38652e+06	1.46584e+06	YES		2.54351e+07	3.93945e+07	1.46584e+06	1.41607e+06	1.97052e+07	0	1.97052e+07	7.11657e+06	5.62584e+06	33931.5	1.97391e+07	1792	3		1025162068	140	143522689520	1.43523e+08	2018-05-14	1.65556	0.0368122	Large-sized	Large-sized	Large-sized	Large-sized	0.109774	0.279794	0.360532	0.614218	0.607663	2.82151	5.64271
8	ČEZ, a. s.	1992-05-06	1993-12-31	1993	1.67778	35.11	Electricity production	0	97231604	197577	14671804	19498397		34367778	161089	YES		72933210	23699365	161089		48352853	54499	48407352	14657243	7278946	189154	48596506	15061	7		53521026	1600	85633641600	8.56336e+07	1993-06-22	0.533333	0.353463	Large-sized	Large-sized	Large-sized	Large-sized	0.150746	0.200968	0.301611	0.00468721	0.243741	1.13143	1.17414
9	ČEZ, a. s.	1992-05-06	1994-12-31	1994	2.69167	35.11	Electricity production	0	116927788	299374	17616162	22544491		40460027	174249	YES		81774085	34020312	174249		48566969	35201	48602170	16188280	8888773	307345	48909515	12570	7		53812874	1360	73185508640	7.31855e+07	1993-06-22	1.54722	0.346026	Large-sized	Large-sized	Large-sized	Large-sized	0.138447	0.197963	0.330984	0.0043067	0.290951	0.925829	0.894972
10	ČEZ, a. s.	1992-05-06	1995-12-31	1995	3.70556	35.11	Electricity production	0	138173850	503285	20875020	24979413		46357718	46207	YES		90293560	46004697	46207		50569792	4121	50573913	14783189	8063793	304023	50877936	11942	7		53958062	941	50774536342	5.07745e+07	1993-06-22	2.56111	0.335503	Large-sized	Large-sized	Large-sized	Large-sized	0.10699	0.163724	0.290562	0.000996749	0.332948	0.710055	0.562327
11	ČEZ, a. s.	1992-05-06	1996-12-31	1996	4.72222	35.11	Electricity production	0	158283916	566272	25497391	39965615		66029278	42516	YES		98137227	57281176	42516		55494494	3009	55497503	12769884	7847600	971682	56469185	11443	7		53982571	979	52848937009	5.28489e+07	1993-06-22	3.57778	0.417157	Large-sized	Large-sized	Large-sized	Large-sized	0.0806771	0.130123	0.226139	0.000643896	0.361889	0.708604	0.538521
12	ČEZ, a. s.	1992-05-06	1997-12-31	1997	5.73611	35.11	Electricity production	0	171810038	645132	30165609	50086301		80897042	33217	YES		101406863	68280655	33217		54806449	3324	54809773	6832080	3367214	903881	55713654	11229	5		53970913	1080	58288586040	5.82886e+07	1993-06-22	4.59167	0.470852	Large-sized	Large-sized	Large-sized	Large-sized	0.0397653	0.067373	0.122628	0.000410608	0.397419	0.745896	0.574799
13	ČEZ, a. s.	1992-05-06	1998-12-31	1998	6.75	35.11	Electricity production	0	180277757	649356	31129248	54165762		85944366	7901	YES		108014942	69437796	7901		54963621	3886	54967507	8656947	6364149	991718	55959225	10600	5		53970913	663.1	3.57881e+10	3.57881e+07	1993-06-22	5.60556	0.476733	Large-sized	Large-sized	Large-sized	Large-sized	0.0480201	0.0801458	0.154701	9.19316e-05	0.385171	0.59298	0.331326
14	ČEZ, a. s.	1992-05-06	1999-12-31	1999	7.76389	35.11	Electricity production	0	196509960	639082	29538912	48905481		79083475	6152	YES		110048990	84344001	6152		53887883	71111	53958994	2862046	2159851	1420674	55379668	9889	4		591949421	88.63	5.24645e+10	5.24645e+07	1993-06-22	6.61944	0.40244	Large-sized	Large-sized	Large-sized	Large-sized	0.0145644	0.026007	0.0516804	7.77912e-05	0.42921	0.703773	0.476737
15	ČEZ, a. s.	1992-05-06	2000-12-31	2000	8.78056	35.11	Electricity production	0	202223562	670902	27835405	46647517		75153824	4673	YES		118940762	81613612	4673		53134882	47047	53181929	8266266	5745414	457598	53639527	9069	4		592088461	101.1	5.98601e+10	5.98601e+07	1993-06-22	7.63611	0.371637	Large-sized	Large-sized	Large-sized	Large-sized	0.0408769	0.069499	0.154108	6.21791e-05	0.403581	0.705413	0.503277
16	ČEZ, a. s.	1992-05-06	2001-12-31	2001	9.79444	35.11	Electricity production	0	202373315	663093	27125687	42171735		69960515	0	NO		123897070	76445796	0		51851799	7352	51859151	9377270	6434442	195902	52055053	8065	5		592088461	77.54	4.59105e+10	4.59105e+07	1993-06-22	8.65	0.3457	Large-sized	Large-sized	Large-sized	Large-sized	0.0463365	0.075686	0.180141	0	0.377746	0.610735	0.370554
17	ČEZ, a. s.	1992-05-06	2002-12-31	2002	10.8083	35.11	Electricity production	0	198874194	699955	37752458	73388194		111840607	0	NO		128194872	69541823	0		49492738	8749	49501487	8031680	6713405	488561	49990048	7364	5		592210843	92.47	5.47617e+10	5.47617e+07	1993-06-22	9.66389	0.562369	Large-sized	Large-sized	Large-sized	Large-sized	0.0403857	0.0626521	0.160666	0	0.349677	0.628632	0.427176
18	ČEZ, a. s.	1992-05-06	2003-12-31	2003	11.8222	35.11	Electricity production	0	217920470	691666	44430807	96249260		141371733	173000	YES		139014969	78224940	173000	50345	54445309	0	54445309	18626473	13931028	660621	55105930	6964	5	55912	592210843	145.7	8.62851e+10	8.62851e+07	1993-06-22	10.6778	0.648731	Large-sized	Large-sized	Large-sized	Large-sized	0.0854737	0.133989	0.338012	0.00122372	0.358961	0.757274	0.620689
19	ČEZ, a. s.	1992-05-06	2004-12-31	2004	12.8389	35.11	Electricity production	0	227777908	652946	42906952	89025067		132584965	811000	YES		147740491	79223443	811000		62214421	0	62214421	16430323	12363700	1026783	63241204	6635	5		592210843	340.7	2.01766e+11	2.01766e+08	1993-06-22	11.6944	0.58208	Large-sized	Large-sized	Large-sized	Large-sized	0.0721331	0.111211	0.259804	0.00611683	0.34781	1.23804	1.36568
20	ČEZ, a. s.	1992-05-06	2005-12-31	2005	13.8528	35.11	Electricity production	0	274208000	675000	46736000	113321000		160732000	270000	YES	107000	174276000	86911000	163000	101000	67644000	0	67644000	20458000	17635000	0	67644000	6618	5		592210843	736.3	4.36045e+11	4.36045e+08	1993-06-22	12.7083	0.586168	Large-sized	Large-sized	Large-sized	Large-sized	0.0746076	0.117389	0.302436	0.00167981	0.316953	2.00223	2.50204
21	ČEZ, a. s.	1992-05-06	2006-12-31	2006	14.8667	35.11	Electricity production	0	311377000	150495000	0	0		150495000	106000	YES	63000	190822000	86025000	43000	53000	95970000	0	95970000	32471000	25803000	0	95970000	6415	5		592210843	960	568522409280	5.68522e+08	1993-06-22	13.7222	0.483321	Large-sized	Large-sized	Large-sized	Large-sized	0.104282	0.170164	0.338345	0.000704342	0.276273	2.36429	2.97933
22	ČEZ, a. s.	1992-05-06	2007-12-31	2007	15.8806	35.11	Electricity production	0	312654000	171494000	0	0		171494000	39000	YES		149448000	102876000	39000		95410000	0	95410000	36987000	31272000	0	95410000	6472	5		592210843	1362	806591168166	8.06591e+08	1993-06-22	14.7361	0.54851	Large-sized	Large-sized	Large-sized	Large-sized	0.1183	0.247491	0.387664	0.000227413	0.329041	3.60436	5.39714
23	ČEZ, a. s.	1992-05-06	2008-12-31	2008	16.8972	35.11	Electricity production	0	392593000	173032000	0	0		173032000	6000	YES		154927000	111233000	6000		109528000	0	109528000	56967000	47118000	0	109528000	6196	6		592210843	784.8	4.64767e+11	4.64767e+08	1993-06-22	15.7528	0.440741	Large-sized	Large-sized	Large-sized	Large-sized	0.145104	0.367702	0.520114	3.46757e-05	0.283329	2.16411	2.99991
24	ČEZ, a. s.	1992-05-06	2009-12-31	2009	17.9111	35.11	Electricity production	0	444698000	184909000	0	0		184909000	0	NO		177460000	258517000	0		119205000	0	119205000	54805000	45427000	0	119205000	6230	6		537989759	864	464823151776	4.64823e+08	1993-06-22	16.7667	0.415808	Large-sized	Large-sized	Large-sized	Large-sized	0.123241	0.30883	0.459754	0	0.581332	1.65912	2.61931
25	ČEZ, a. s.	1992-05-06	2010-12-31	2010	18.925	35.11	Electricity production	0	469161000	195172000	0	0		195172000	0	NO		189468000	269140000	0		110198000	0	110198000	42321000	34762000	0	110198000	6009	6		537989759	783	421245981297	4.21246e+08	1993-06-22	17.7806	0.416002	Large-sized	Large-sized	Large-sized	Large-sized	0.0902057	0.223368	0.384045	0	0.573662	1.50539	2.22331
26	ČEZ, a. s.	1992-05-06	2011-12-31	2011	19.9389	35.11	Electricity production	0	503660000	206703000	0	0		206703000	0	NO		192600000	302262000	0		113441000	0	113441000	43896000	37337000	0	113441000	5933	7		537989759	786	422859950574	4.2286e+08	1993-06-22	18.7944	0.410402	Large-sized	Large-sized	Large-sized	Large-sized	0.087154	0.227913	0.38695	0	0.600131	1.4653	2.19553
27	ČEZ, a. s.	1992-05-06	2012-12-31	2012	20.9556	35.11	Electricity production	0	538873000	220452000	0	0		220452000	0	NO		210911000	316946000	0		108147000	0	108147000	41610000	35336000	0	108147000	5722	7		537989759	680	365833036120	3.65833e+08	1993-06-22	19.8111	0.409098	Large-sized	Large-sized	Large-sized	Large-sized	0.0772167	0.197287	0.384754	0	0.588165	1.29349	1.73454
28	ČEZ, a. s.	1992-05-06	2013-12-31	2013	21.9694	35.11	Electricity production	0	549257000	233938000	0	0		233938000	0	NO		205243000	335270000	0		101644000	0	101644000	29662000	26373000	0	101644000	5678	7		537989759	517	278140705403	2.78141e+08	1993-06-22	20.825	0.425917	Large-sized	Large-sized	Large-sized	Large-sized	0.0540039	0.144521	0.291822	0	0.610406	1.13487	1.35518
29	ČEZ, a. s.	1992-05-06	2014-12-31	2014	22.9833	35.11	Electricity production	0	537183000	240724000	0	0		240724000	0	NO		206132000	321427000	0		84706000	0	84706000	22688000	20910000	0	84706000	5373	7		537989759	591	317951947569	3.17952e+08	1993-06-22	21.8389	0.448123	Large-sized	Large-sized	Large-sized	Large-sized	0.0422351	0.110065	0.267844	0	0.598357	1.21196	1.54247
30	ČEZ, a. s.	1992-05-06	2015-12-31	2015	23.9972	35.11	Electricity production	0	516380000	240757000	0	0		240757000	0	NO		220569000	297811000	0		72635000	9088000	81723000	29814000	28115000	1597000	83320000	5019	7		537989759	444.3	2.39029e+11	2.39029e+08	1993-06-22	22.8528	0.46624	Large-sized	Large-sized	Large-sized	Large-sized	0.0577366	0.135169	0.357825	0	0.576728	1.03561	1.08369
31	ČEZ, a. s.	1992-05-06	2016-12-31	2016	25.0139	35.11	Electricity production	0	536934000	241230000	0	0		241230000	0	NO		200698000	336236000	0		72462000	8126000	80588000	8462000	8834000	1205000	81793000	5079	7		537989759	430	231335596370	2.31336e+08	1993-06-22	23.8694	0.449273	Large-sized	Large-sized	Large-sized	Large-sized	0.0157599	0.0421629	0.103456	0	0.626215	1.05706	1.15266
32	ČEZ, a. s.	1992-05-06	2017-12-31	2017	26.0278	35.11	Electricity production	0	532770000	240229000	0	0		240229000	0	NO		187507000	345263000	0		65830000	9154000	74984000	4548000	5105000	2273000	77257000	5086	7		537989759	496.5	2.67112e+11	2.67112e+08	1993-06-22	24.8833	0.450906	Large-sized	Large-sized	Large-sized	Large-sized	0.00853652	0.0242551	0.0588685	0	0.648053	1.14942	1.42454
33	ČEZ, a. s.	1992-05-06	2018-12-31	2018	27.0417	35.11	Electricity production	0	626075000	231097000	0	0		231097000	0	NO		183212000	442863000	0	2347000	74151000	4834000	78985000	22609000	23776000	764000	79749000	5311	7		537989759	535	287824521065	2.87825e+08	1993-06-22	25.8972	0.36912	Large-sized	Large-sized	Large-sized	Large-sized	0.0361123	0.123403	0.283502	0	0.707364	1.16709	1.57099
34	ČEZ, a. s.	1992-05-06	2019-12-31	2019	28.0556	35.11	Electricity production	0	622086000	239551000	0	0		239551000	5618000	YES	2347000	203479000	418607000	3271000	2144000	81943000	5002000	86945000	17797000	17393000	1353000	88298000	5381	7		537989759	509.5	2.74106e+11	2.74106e+08	1993-06-22	26.9111	0.385077	Large-sized	Large-sized	Large-sized	Large-sized	0.0286086	0.0874636	0.201556	0.0234522	0.672909	1.11353	1.3471
35	Komerční banka, a.s.	1992-03-05	2002-12-31	2002	10.9806	64.19	Other monetary intermediation	0	446092000	10411000	0	0		10411000	333000	YES	0	35366000	410494000	333000	291000	25920000	0	25920000	11781000	9120000	21000	25941000	9951	6		38009852	2078	78984472456	7.89845e+07	2001-12-10	1.07222	0.0233382	Large-sized	Large-sized	Large-sized	Large-sized	0.0264094	0.333117	0.454146	0.0319854	0.9202	1.09783	2.23334
36	Komerční banka, a.s.	1992-03-05	2003-12-31	2003	11.9944	64.19	Other monetary intermediation	0	456663000	10378000	0	0		10378000	146000	YES	0	41401000	415016000	146000	122000	22537000	0	22537000	12896000	8669000	433000	22970000	8813	6		38009852	2418	91907822136	9.19078e+07	2001-12-10	2.08611	0.0227257	Large-sized	Large-sized	Large-sized	Large-sized	0.0282396	0.31149	0.561428	0.0140682	0.908801	1.11066	2.21994
37	Komerční banka, a.s.	1992-03-05	2004-12-31	2004	13.0111	64.19	Other monetary intermediation	0	460269000	9234000	0	0		9234000	14000	YES	0	44451000	415745000	14000	14000	23212000	0	23212000	12787000	8897000	13000	23225000	7718	6		38009852	3272	124368235744	1.24368e+08	2001-12-10	3.10278	0.0200622	Large-sized	Large-sized	Large-sized	Large-sized	0.0277816	0.287665	0.550571	0.00151614	0.903265	1.17366	2.79787
38	Komerční banka, a.s.	1992-03-05	2005-12-31	2005	14.025	64.19	Other monetary intermediation	0	514934000	7278000	0	0		7278000	1000	YES	0	51327000	463607000	1000	1000	24519000	0	24519000	11565000	8911000	106000	24625000	7750	5		38009852	3441	130791900732	1.30792e+08	2001-12-10	4.11667	0.0141339	Large-sized	Large-sized	Large-sized	Large-sized	0.0224592	0.22532	0.469645	0.0001374	0.900323	1.15432	2.54821
39	Komerční banka, a.s.	1992-03-05	2006-12-31	2006	15.0389	64.19	Other monetary intermediation	0	597555000	7795000	0	0		7795000	0	NO	0	50598000	546957000	0	0	26302000	0	26302000	11815000	9120000	184000	26486000	8305	5		38009852	3099	117792531348	1.17793e+08	2001-12-10	5.13056	0.0130448	Large-sized	Large-sized	Large-sized	Large-sized	0.0197722	0.233507	0.446085	0	0.915325	1.11245	2.32801
40	Komerční banka, a.s.	1992-03-05	2007-12-31	2007	16.0528	64.19	Other monetary intermediation	0	661819000	7656000	0	0		7656000	0	NO	0	50654000	611165000	0	0	29665000	0	29665000	14328000	11225000	109000	29774000	8613	5		38009852	4371	166141063092	1.66141e+08	2001-12-10	6.14444	0.0115681	Large-sized	Large-sized	Large-sized	Large-sized	0.0216494	0.28286	0.481225	0	0.923462	1.1745	3.27992
41	Komerční banka, a.s.	1992-03-05	2008-12-31	2008	17.0694	64.19	Other monetary intermediation	0	699044000	7581000	0	0		7581000	0	NO	0	62974000	636070000	0	0	33714000	0	33714000	16257000	13233000	12000	33726000	8905	6		38009852	2970	112889260440	1.12889e+08	2001-12-10	7.16111	0.0108448	Large-sized	Large-sized	Large-sized	Large-sized	0.023256	0.258154	0.482032	0	0.909914	1.07141	1.79263
42	Komerční banka, a.s.	1992-03-05	2009-12-31	2009	18.0833	64.19	Other monetary intermediation	0	695036000	7729000	0	0		7729000	0	NO	0	68753000	626283000	0	0	33041000	0	33041000	13549000	11094000	24000	33065000	8815	6		38009852	3929	149340708508	1.49341e+08	2001-12-10	8.175	0.0111203	Large-sized	Large-sized	Large-sized	Large-sized	0.019494	0.197068	0.409769	0	0.90108	1.11595	2.17213
43	Komerční banka, a.s.	1992-03-05	2010-12-31	2010	19.0972	64.19	Other monetary intermediation	0	698014000	7072000	0	0		7072000	0	NO	0	76078000	621936000	0	0	32662000	0	32662000	16075000	13410000	75000	32737000	8619	7		38009852	4435	168573693620	1.68574e+08	2001-12-10	9.18889	0.0101316	Large-sized	Large-sized	Large-sized	Large-sized	0.0230296	0.211296	0.491035	0	0.891008	1.13251	2.2158
44	Komerční banka, a.s.	1992-03-05	2011-12-31	2011	20.1111	64.19	Other monetary intermediation	0	754810000	6934000	0	0		6934000	0	NO	0	81850000	672960000	0	0	32764000	0	32764000	11456000	9718000	81000	32845000	8774	6		38009852	3330	126572807160	1.26573e+08	2001-12-10	10.2028	0.00918642	Large-sized	Large-sized	Large-sized	Large-sized	0.0151773	0.139963	0.34879	0	0.891562	1.05925	1.5464
45	Komerční banka, a.s.	1992-03-05	2012-12-31	2012	21.1278	64.19	Other monetary intermediation	0	786836000	7994000	0	0		7994000	0	NO	0	100577000	686259000	0	0	32689000	0	32689000	16939000	14231000	121000	32810000	8758	8		38009852	4010	152419506520	1.5242e+08	2001-12-10	11.2194	0.0101597	Large-sized	Large-sized	Large-sized	Large-sized	0.021528	0.168418	0.516276	0	0.872175	1.06589	1.51545
46	Komerční banka, a.s.	1992-03-05	2013-12-31	2013	22.1417	64.19	Other monetary intermediation	0	863980000	7872000	0	0		7872000	0	NO	0	96538000	767442000	0	0	30894000	0	30894000	15731000	12906000	208000	31102000	8604	6		38009852	4421	168041555692	1.68042e+08	2001-12-10	12.2333	0.00911132	Large-sized	Large-sized	Large-sized	Large-sized	0.0182076	0.162951	0.505787	0	0.888264	1.08276	1.74068
47	Komerční banka, a.s.	1992-03-05	2014-12-31	2014	23.1556	64.19	Other monetary intermediation	0	953261000	7666000	0	0		7666000	0	NO	0	109494000	843767000	0	0	30677000	0	30677000	16030000	13361000	191000	30868000	8520	6		38009852	4740	180166698480	1.80167e+08	2001-12-10	13.2472	0.00804187	Large-sized	Large-sized	Large-sized	Large-sized	0.016816	0.146401	0.519308	0	0.885137	1.07414	1.64545
48	Komerční banka, a.s.	1992-03-05	2015-12-31	2015	24.1694	64.19	Other monetary intermediation	0	891556000	6844000	0	0		6844000	0	NO	0	106229000	785327000	0	0	30131000	0	30131000	15770000	13132000	153000	30284000	8426	7		38009852	4950	188148767400	1.88149e+08	2001-12-10	14.2611	0.00767647	Large-sized	Large-sized	Large-sized	Large-sized	0.0176882	0.148453	0.520737	0	0.88085	1.09188	1.77116
49	Komerční banka, a.s.	1992-03-05	2016-12-31	2016	25.1861	64.19	Other monetary intermediation	0	922737000	6666000	0	0		6666000	0	NO	0	105401000	817336000	0	0	31750000	0	31750000	16873000	14074000	203000	31953000	8476	12		190049260	885	168193595100	1.68194e+08	2001-12-10	15.2778	0.00722416	Large-sized	Large-sized	Large-sized	Large-sized	0.0182858	0.160084	0.528057	0	0.885774	1.06805	1.59575
50	Komerční banka, a.s.	1992-03-05	2017-12-31	2017	26.2	64.19	Other monetary intermediation	0	1004039000	7404000	0	0		7404000	0	NO	0	100346000	903693000	0	0	31060000	0	31060000	18286000	15274000	216000	31276000	8492	13		190049260	915	173895072900	1.73895e+08	2001-12-10	16.2917	0.00737422	Large-sized	Large-sized	Large-sized	Large-sized	0.0182124	0.182229	0.584666	0	0.900058	1.07325	1.73295
51	Komerční banka, a.s.	1992-03-05	2018-12-31	2018	27.2139	64.19	Other monetary intermediation	0	1059932000	7676000	0	0		7676000	0	NO	0	103329000	956603000	0	0	32203000	0	32203000	18519000	15171000	238000	32441000	8413	13		190049260	847	160971723220	1.60972e+08	2001-12-10	17.3056	0.00724197	Large-sized	Large-sized	Large-sized	Large-sized	0.0174719	0.179224	0.570852	0	0.902514	1.05438	1.55786
52	Komerční banka, a.s.	1992-03-05	2019-12-31	2019	28.2278	64.19	Other monetary intermediation	0	1077334000	10528000	0	0		10528000	2780000	YES	2780000	108635000	968699000	2724000	2724000	32573000	0	32573000	18591000	15172000	306000	32879000	8167	12		190049260	829.5	157645861170	1.57646e+08	2001-12-10	18.3194	0.00977227	Large-sized	Large-sized	Large-sized	Large-sized	0.0172565	0.171133	0.565437	0.264058	0.899163	1.04549	1.45115
53	Photon Energy N.V.	2008-01-01	2016-12-31	2016	9.13056	27.90	Production of electrical equipment	0	2.35412e+06	1.99886e+06	0	0		1.99886e+06	12915.6	YES	0	653344	1.70077e+06	0	0	353665	0	353665	-53931.9	-71873.2	10105.5	363770	62	2		60000000	7	420000000	420000	2016-10-17	0.208333	0.84909	Large-sized	Large-sized	Medium-sized	Medium-sized	-0.0229096	-0.0825476	-0.148258	0.00646147	0.722468	0.900879	0.642847
54	Photon Energy N.V.	2008-01-01	2017-12-31	2017	10.1444	27.90	Production of electrical equipment	0	2.29073e+06	1.85783e+06	0	0		1.85783e+06	16064.7	YES	0	663580	1.62713e+06	0	0	439773	0	439773	8836.84	-20610.8	13204.2	452977	74	2		60000000	9.25	555000000	555000	2016-10-17	1.22222	0.81102	Large-sized	Large-sized	Medium-sized	Medium-sized	0.00385765	0.0133169	0.0195083	0.008647	0.710309	0.9526	0.836372
55	Photon Energy N.V.	2008-01-01	2018-12-31	2018	11.1583	27.90	Production of electrical equipment	0	2.7358e+06	2.03984e+06	0	0		2.03984e+06	22355	YES	0	766065	1.96974e+06	0	0	521086	0	521086	47334	13119.8	10084.2	531170	92	2		60000000	8.7	5.22e+08	522000	2016-10-17	2.23611	0.745609	Large-sized	Large-sized	Medium-sized	Medium-sized	0.0173017	0.0617885	0.0891127	0.0109592	0.719985	0.910789	0.681405
56	Photon Energy N.V.	2008-01-01	2019-12-31	2019	12.1722	27.90	Production of electrical equipment	0	3.51326e+06	2.56125e+06	0	0		2.56125e+06	20480.5	YES	76585.7	961591	2.5517e+06	0	0	766213	0	766213	25105.1	-18447.7	5310.69	771524	117	2		60000000	42	2520000000	2520000	2016-10-17	3.25	0.729024	Large-sized	Large-sized	Medium-sized	Medium-sized	0.0071458	0.0261079	0.0325396	0.00799627	0.726304	1.44358	2.62066
57	STOCK SPIRITS GROUP PLC	2008-01-01	2013-12-31	2013	6.08611	11.01	Distillation, rectification and mixing of spirits	0	2.11787e+07	1.82209e+06	0	0		1.82209e+06	12149.3	YES	0	8.77797e+06	1.24007e+07	11792.8	0	9.33925e+06	0	9.33925e+06	-238049	199106	50654	9.38991e+06	962	7		200000000	95.5	19100000000	19100000	2013-10-23	0.191667	0.086034	Large-sized	Large-sized	Large-sized	Large-sized	-0.01124	-0.0271189	-0.0253516	0.00666777	0.585528	1.48738	2.1759
58	STOCK SPIRITS GROUP PLC	2008-01-01	2014-12-31	2014	7.1	11.01	Distillation, rectification and mixing of spirits	0	2.0208e+07	1.72316e+06	0	0		1.72316e+06	16191.4	YES	0	9.52365e+06	1.06843e+07	15914.2	0	8114553	0	8114553	1.35958e+06	748769	213871	8.32842e+06	923	7		200000000	83.2	16640000000	16640000	2013-10-23	1.20556	0.0852715	Large-sized	Large-sized	Large-sized	Large-sized	0.0672793	0.142758	0.163246	0.00939632	0.528718	1.35216	1.74723
59	STOCK SPIRITS GROUP PLC	2008-01-01	2015-12-31	2015	8.11389	11.01	Distillation, rectification and mixing of spirits	0	1.83651e+07	1.61077e+06	0	0		1.61077e+06	13431.4	YES	0	9.8604e+06	8.50469e+06	12755.8	0	7.09809e+06	0	7.09809e+06	850017	764564	64508.7	7.1626e+06	875	7		200000000	79.7	15940000000	15940000	2013-10-23	2.21944	0.0877084	Large-sized	Large-sized	Large-sized	Large-sized	0.0462844	0.0862052	0.118674	0.00833851	0.46309	1.33104	1.61657
60	STOCK SPIRITS GROUP PLC	2008-01-01	2016-12-31	2016	9.13056	11.01	Distillation, rectification and mixing of spirits	0	1.80225e+07	1.50515e+06	0	0		1.50515e+06	7754.74	YES	0	9.4186e+06	8.60392e+06	6241.62	0	7.04665e+06	0	7.04665e+06	1.0584e+06	558395	46015.1	7.09267e+06	876	9	66036.9	200000000	50.85	10170000000	10170000	2013-10-23	3.23611	0.0835149	Large-sized	Large-sized	Large-sized	Large-sized	0.0587265	0.112373	0.149225	0.00515214	0.477398	1.04169	1.07978
61	STOCK SPIRITS GROUP PLC	2008-01-01	2017-12-31	2017	10.1444	11.01	Distillation, rectification and mixing of spirits	0	1.74317e+07	1.29925e+06	0	0		1.29925e+06	4903.68	YES	0	9.04905e+06	8.3903e+06	4188.56	0	7.01331e+06	0	7.01331e+06	697472	501452	17392.7	7.0307e+06	980	9	111252	200000000	56.45	11290000000	11290000	2013-10-23	4.25	0.0745335	Large-sized	Large-sized	Large-sized	Large-sized	0.0400117	0.0770768	0.0992037	0.00377425	0.481324	1.1285	1.24764
62	STOCK SPIRITS GROUP PLC	2008-01-01	2018-12-31	2018	11.1583	11.01	Distillation, rectification and mixing of spirits	0	1.61488e+07	1.21589e+06	0	0		1.21589e+06	6868.58	YES	0	9.05214e+06	7.0967e+06	6534.15	0	4.98463e+06	0	4.98463e+06	682407	446920	6405.53	4.99104e+06	1003	9	94359.3	200000000	78.1	1.562e+10	1.562e+07	2013-10-23	5.26389	0.0752928	Large-sized	Large-sized	Large-sized	Large-sized	0.0422573	0.0753863	0.136727	0.005649	0.439456	1.40671	1.72556
63	STOCK SPIRITS GROUP PLC	2008-01-01	2019-12-31	2019	12.1722	11.01	Distillation, rectification and mixing of spirits	0	1.71072e+07	1.3651e+06	0	0		1.3651e+06	12781.2	YES	0	9.18353e+06	7.92363e+06	5107.41	0	7.93857e+06	0	7.93857e+06	971424	709650	7927.92	7.94649e+06	1080	9	133707	200000000	61.4	12280000000	12280000	2013-10-23	6.27778	0.0797971	Large-sized	Large-sized	Large-sized	Large-sized	0.0567847	0.105779	0.122246	0.00936284	0.463176	1.181	1.33718
64	O2 Czech Republic a.s.	1994-01-01	1995-12-31	1995	2.025	61.20	Telecommunication networks	1	96716988	52551388	0	0		52551388	533030	YES	0	75427517	20068281	0	0	23141862	626894	23768756	4192225	4216558	691426	24460182	26097	9	533030	32208990	98.1	3159701919	3.1597e+06	1995-03-01	0.847222	0.543352	Large-sized	Large-sized	Large-sized	Large-sized	0.0433453	0.0555795	0.17139	0.010143	0.207495	0.243236	0.0418906
65	O2 Czech Republic a.s.	1994-01-01	1996-12-31	1996	3.04167	61.20	Telecommunication networks	1	104660777	76349512	0	0		76349512	545617	YES	0	79241039	23548923	0	0	28859357	512276	29371633	5579054	3456307	783213	30154846	26504	9	545617	32208990	98.1	3159701919	3.1597e+06	1995-03-01	1.86389	0.729495	Large-sized	Large-sized	Large-sized	Large-sized	0.0533061	0.0704061	0.185014	0.00714631	0.225002	0.259837	0.0398746
66	O2 Czech Republic a.s.	1994-01-01	1997-12-31	1997	4.05556	61.20	Telecommunication networks	0	122377247	99964422	0	0		99964422	529874	YES	0	83030712	34723940	0	0	34473850	440552	34914402	5586830	4226442	566796	35481198	25702	9	529874	32208990	3660.1	117888124299	1.17888e+08	1995-03-01	2.87778	0.816855	Large-sized	Large-sized	Large-sized	Large-sized	0.0456525	0.0672863	0.157459	0.00530063	0.283745	1.29602	1.41981
67	O2 Czech Republic a.s.	1994-01-01	1998-12-31	1998	5.06944	61.20	Telecommunication networks	0	137907450	118639634	0	0		118639634	425383	YES	0	87307575	47051761	0	0	39810795	399099	40209894	5348551	4360052	292385	40502279	22277	9	425383	322089890	458.8	147774841532	1.47775e+08	1995-03-01	3.89167	0.860284	Large-sized	Large-sized	Large-sized	Large-sized	0.0387836	0.061261	0.132056	0.0035855	0.341184	1.45004	1.69258
68	O2 Czech Republic a.s.	1994-01-01	1999-12-31	1999	6.08333	61.20	Telecommunication networks	0	146218376	120285386	0	0		120285386	296448	YES	0	91585695	49962489	0	0	43466541	296732	43763273	5112324	4409687	101934	43865207	20916	9	296448	322089890	576.5	185684821585	1.85685e+08	1995-03-01	4.90556	0.822642	Large-sized	Large-sized	Large-sized	Large-sized	0.0349636	0.0558201	0.116546	0.00246454	0.341698	1.66479	2.02744
69	O2 Czech Republic a.s.	1994-01-01	2000-12-31	2000	7.1	61.20	Telecommunication networks	0	154065815	117163390	0	0		117163390	2285000	YES	0	103458091	45581305	0	0	45289629	306361	45595990	4011000	6153936	0	45595990	17439	9	2285000	322089890	507.2	163363992208	1.63364e+08	1995-03-01	5.92222	0.760476	Large-sized	Large-sized	Large-sized	Large-sized	0.0260343	0.0387693	0.0879683	0.0195027	0.295856	1.40195	1.57904
70	O2 Czech Republic a.s.	1994-01-01	2001-12-31	2001	8.11389	61.20	Telecommunication networks	0	155075800	113670236	0	0		113670236	2921000	YES	0	105434509	38954101	0	0	41910818	340662	42251480	1374423	4505919	0	42251480	15825	9	2921000	322089890	362.5	116757585125	1.16758e+08	1995-03-01	6.93611	0.732998	Large-sized	Large-sized	Large-sized	Large-sized	0.00886291	0.0130358	0.0325296	0.0256971	0.251194	1.07842	1.10739
71	O2 Czech Republic a.s.	1994-01-01	2002-12-31	2002	9.12778	61.20	Telecommunication networks	0	156351000	119498000	0	0		119498000	2936000	YES	0	112272000	45034000	0	0	52856000	0	52856000	6110000	4276000	0	52856000	14322	9	2936000	322089890	244.7	78815396083	7.88154e+07	1995-03-01	7.95	0.764293	Large-sized	Large-sized	Large-sized	Large-sized	0.0390787	0.0544214	0.115597	0.0245694	0.288031	0.787315	0.702004
72	O2 Czech Republic a.s.	1994-01-01	2003-12-31	2003	10.1417	61.20	Telecommunication networks	0	154706000	110320000	0	0		110320000	4716000	YES	0	90148000	64549000	0	0	51476000	0	51476000	-6667000	-1780000	0	51476000	12000	9	4716000	322089890	291.3	93824784957	9.38248e+07	1995-03-01	8.96389	0.713095	Large-sized	Large-sized	Large-sized	Large-sized	-0.0430946	-0.0739562	-0.129517	0.0427484	0.417237	1.02377	1.04079
73	O2 Czech Republic a.s.	1994-01-01	2004-12-31	2004	11.1583	61.20	Telecommunication networks	0	134203000	98835000	0	0		98835000	4732000	YES	0	90199000	44004000	0	0	62141000	0	62141000	7914000	5568000	0	62141000	11000	9	4732000	322089890	369.2	118915587388	1.18916e+08	1995-03-01	9.98056	0.736459	Large-sized	Large-sized	Large-sized	Large-sized	0.0589704	0.0877393	0.127356	0.0478778	0.327891	1.21398	1.31837
74	O2 Czech Republic a.s.	1994-01-01	2005-12-31	2005	12.1722	61.20	Telecommunication networks	0	124211000	88003000	0	0		88003000	4201000	YES	0	94975000	29236000	0	0	61040000	0	61040000	8748000	6248000	0	61040000	10541	5	4201000	322089890	524.5	168936147305	1.68936e+08	1995-03-01	10.9944	0.708496	Large-sized	Large-sized	Large-sized	Large-sized	0.0704285	0.0921084	0.143316	0.047737	0.235374	1.59545	1.77874
75	O2 Czech Republic a.s.	1994-01-01	2006-12-31	2006	13.1861	61.20	Telecommunication networks	0	117877000	78755000	0	0		78755000	6706000	YES	0	88481000	29396000	0	0	61311000	0	61311000	10940000	8020000	0	61311000	9951	9	6706000	322089900	476	153314792400	1.53315e+08	1995-03-01	12.0083	0.668112	Large-sized	Large-sized	Large-sized	Large-sized	0.0928086	0.123642	0.178435	0.0851501	0.249379	1.55001	1.73274
76	O2 Czech Republic a.s.	1994-01-01	2007-12-31	2007	14.2	61.20	Telecommunication networks	0	113552000	71809000	0	0		71809000	8607000	YES	0	82792000	30760000	0	0	63196000	0	63196000	13510000	10386000	0	63196000	9417	9	8607000	322089900	544.8	175474577520	1.75475e+08	1995-03-01	13.0222	0.632389	Large-sized	Large-sized	Large-sized	Large-sized	0.118976	0.16318	0.213779	0.11986	0.270889	1.81621	2.11946
77	O2 Czech Republic a.s.	1994-01-01	2008-12-31	2008	15.2167	61.20	Telecommunication networks	0	103623000	63429000	0	0		63429000	12042000	YES	0	78168000	25455000	0	0	64709000	0	64709000	15348000	11628000	0	64709000	9258	7	12042000	322089900	424.1	136598326590	1.36598e+08	1995-03-01	14.0389	0.612113	Large-sized	Large-sized	Large-sized	Large-sized	0.148114	0.196346	0.237185	0.18985	0.24565	1.56387	1.7475
78	O2 Czech Republic a.s.	1994-01-01	2009-12-31	2009	16.2306	61.20	Telecommunication networks	0	92768000	57545000	0	0		57545000	11100000	YES	0	73879000	18889000	0	0	59899000	0	59899000	14877000	11817000	0	59899000	8974	5	11100000	322089900	418	134633578200	1.34634e+08	1995-03-01	15.0528	0.620311	Large-sized	Large-sized	Large-sized	Large-sized	0.160368	0.20137	0.248368	0.192893	0.203615	1.65491	1.82235
79	O2 Czech Republic a.s.	1994-01-01	2010-12-31	2010	17.2444	61.20	Telecommunication networks	0	92792000	56651000	0	0		56651000	10138000	YES	0	73176000	19616000	0	0	46004000	0	46004000	15318000	12173000	9708000	55712000	8145	5	10138000	322089900	381.5	122877296850	1.22877e+08	1995-03-01	16.0667	0.610516	Large-sized	Large-sized	Large-sized	Large-sized	0.165079	0.209331	0.27495	0.178955	0.211398	1.53562	1.6792
80	O2 Czech Republic a.s.	1994-01-01	2011-12-31	2011	18.2583	61.20	Telecommunication networks	0	88982000	51525000	0	0		51525000	9984000	YES	0	69097000	19885000	0	0	45898000	0	45898000	10008000	8794000	9814000	55712000	7297	4	9984000	322089900	383.1	123392640690	1.23393e+08	1995-03-01	17.0806	0.57905	Large-sized	Large-sized	Large-sized	Large-sized	0.112472	0.14484	0.179638	0.19377	0.223472	1.61019	1.78579
81	O2 Czech Republic a.s.	1994-01-01	2012-12-31	2012	19.275	61.20	Telecommunication networks	0	79199000	46691000	0	0		46691000	9061000	YES	0	60574000	18625000	0	0	40740000	0	40740000	8156000	6711000	9794000	50534000	6275	7	9061000	322089900	323.5	104196082650	1.04196e+08	1995-03-01	18.0972	0.58954	Large-sized	Large-sized	Large-sized	Large-sized	0.102981	0.134645	0.161396	0.194063	0.235167	1.55079	1.72015
82	O2 Czech Republic a.s.	1994-01-01	2013-12-31	2013	20.2889	61.20	Telecommunication networks	0	73949000	41857000	0	0		41857000	6887000	YES	0	55749000	18200000	0	0	47895000	0	47895000	7264000	6068000	867000	48762000	5607	7	6887000	315648092	295	93116187140	9.31162e+07	1995-03-01	19.1111	0.566025	Large-sized	Large-sized	Large-sized	Large-sized	0.0982299	0.130298	0.148968	0.164536	0.246116	1.50531	1.67028
83	O2 Czech Republic a.s.	1994-01-01	2014-12-31	2014	21.3028	61.20	Telecommunication networks	0	74290000	36200000	0	0		36200000	6815000	YES	0	54153000	20137000	0	0	44689000	0	44689000	5178000	4038000	775000	45464000	4892	5	6815000	315648092	233	73546005436	7.3546e+07	1995-03-01	20.125	0.48728	Large-sized	Large-sized	Large-sized	Large-sized	0.0696998	0.095618	0.113892	0.18826	0.271059	1.26104	1.35812
84	O2 Czech Republic a.s.	1994-01-01	2015-12-31	2015	22.3167	61.20	Telecommunication networks	0	30268000	4638000	0	0		4638000	2774000	YES	0	18344000	11924000	0	0	37385000	0	37385000	6438000	6799000	394000	37779000	3908	3	2774000	310220057	251	77865234307	7.78652e+07	1995-03-01	21.1389	0.153231	Large-sized	Large-sized	Large-sized	Large-sized	0.2127	0.350959	0.170412	0.598103	0.393947	2.96647	4.24472
85	O2 Czech Republic a.s.	1994-01-01	2016-12-31	2016	23.3333	61.20	Telecommunication networks	0	33306000	5075000	0	0		5075000	2772000	YES	0	17505000	15801000	0	0	37522000	0	37522000	6744000	5259000	208000	37730000	4882	3	2772000	310220057	259.8	8.05952e+10	8.05952e+07	1995-03-01	22.1556	0.152375	Large-sized	Large-sized	Large-sized	Large-sized	0.202486	0.385261	0.178744	0.546207	0.474419	2.89426	4.60412
86	O2 Czech Republic a.s.	1994-01-01	2017-12-31	2017	24.3472	61.20	Telecommunication networks	0	34842000	5636000	0	0		5636000	2475000	YES	0	15475000	19367000	0	0	37709000	0	37709000	7098000	5587000	146000	37855000	5275	3	2475000	310220057	276.5	8.57758e+10	8.57758e+07	1995-03-01	23.1694	0.161759	Large-sized	Large-sized	Large-sized	Large-sized	0.20372	0.458675	0.187505	0.439141	0.555852	3.0177	5.54287
87	O2 Czech Republic a.s.	1994-01-01	2018-12-31	2018	25.3611	61.20	Telecommunication networks	0	36130000	6130000	0	0		6130000	3360000	YES	0	15225000	20905000	0	0	37996000	0	37996000	6916000	5448000	207000	38203000	5381	3	3360000	310220057	241	74763033737	7.4763e+07	1995-03-01	24.1833	0.169665	Large-sized	Large-sized	Large-sized	Large-sized	0.19142	0.454253	0.181033	0.548124	0.578605	2.64788	4.91054
88	O2 Czech Republic a.s.	1994-01-01	2019-12-31	2019	26.375	61.20	Telecommunication networks	0	42680000	6171000	0	0		6171000	4168000	YES	0	14177000	28503000	0	4094000	38760000	0	38760000	6885000	5460000	160000	38920000	5116	3	0	310220057	234	72591493338	7.25915e+07	1995-03-01	25.1972	0.144588	Large-sized	Large-sized	Large-sized	Large-sized	0.161317	0.485646	0.176901	0.675417	0.66783	2.36866	5.12037
89	PFNonwovens a.s.	2003-11-14	2006-12-31	2006	3.175	13.20	Textile weaving	1							0	NO	0			0	0										0		753			2006-12-18	0.0361111		Micro-sized	Large-sized	Micro-sized	Large-sized
90	PFNonwovens a.s.	2003-11-14	2007-12-31	2007	4.18889	13.20	Textile weaving	1							0	NO	0			0	0										0		750.5			2006-12-18	1.05		Micro-sized	Large-sized	Micro-sized	Large-sized
91	PFNonwovens a.s.	2003-11-14	2008-12-31	2008	5.20556	13.20	Textile weaving	1							0	NO	0			0	0										0		232.9			2006-12-18	2.06667		Micro-sized	Large-sized	Micro-sized	Large-sized
92	PFNonwovens a.s.	2003-11-14	2009-12-31	2009	6.21944	13.20	Textile weaving	1	6.24169e+06	2.88111e+06	0	0		2.88111e+06	0	NO	0	2.99777e+06	3.24392e+06	0	0	3.26702e+06	0	3.26702e+06	569686	550525	0	3.26702e+06	380	6	0	9229400	444.5	4102468300	4.10247e+06	2006-12-18	3.08056	0.461592	Large-sized	Large-sized	Large-sized	Large-sized	0.091271	0.190036	0.174374	0	0.519718	1.17699	1.36851
93	PFNonwovens a.s.	2003-11-14	2010-12-31	2010	7.23333	13.20	Textile weaving	1	6.2956e+06	2.69929e+06	0	0		2.69929e+06	0	NO	0	3.23377e+06	3.06183e+06	0	0	3712639	0	3712639	548764	527237	0	3712639	384	6	0	9229400	468	4319359200	4.31936e+06	2006-12-18	4.09444	0.428758	Large-sized	Large-sized	Large-sized	Large-sized	0.0871663	0.169698	0.14781	0	0.486345	1.17244	1.3357
94	PFNonwovens a.s.	2003-11-14	2011-12-31	2011	8.24722	13.20	Textile weaving	1	7.81593e+06	3.91711e+06	0	0		3.91711e+06	0	NO	0	3.37371e+06	4.44222e+06	0	0	4.27888e+06	0	4.27888e+06	471701	360323	0	4.27888e+06	424	5	0	9229400	457	4217835800	4.21784e+06	2006-12-18	5.10833	0.50117	Large-sized	Large-sized	Large-sized	Large-sized	0.0603513	0.139817	0.110239	0	0.568354	1.108	1.25021
95	PFNonwovens a.s.	2003-11-14	2012-12-31	2012	9.26389	13.20	Textile weaving	1							0	NO	0			0	0										0		493			2006-12-18	6.125		Micro-sized	Large-sized	Micro-sized	Large-sized
96	PFNonwovens a.s.	2003-11-14	2013-12-31	2013	10.2778	13.20	Textile weaving	1							0	NO	0			0	0										0		592			2006-12-18	7.13889		Micro-sized	Large-sized	Micro-sized	Large-sized
97	PFNonwovens a.s.	2003-11-14	2014-12-31	2014	11.2917	13.20	Textile weaving	1							0	NO	0			0	0										0		640			2006-12-18	8.15278		Micro-sized	Large-sized	Micro-sized	Large-sized
98	PFNonwovens a.s.	2003-11-14	2015-12-31	2015	12.3056	13.20	Textile weaving	1							0	NO	0			0	0										0		731			2006-12-18	9.16667		Micro-sized	Large-sized	Micro-sized	Large-sized
99	PFNonwovens a.s.	2003-11-14	2016-12-31	2016	13.3222	13.20	Textile weaving	1							0	NO	0			0	0										0		769			2006-12-18	10.1833		Micro-sized	Large-sized	Micro-sized	Large-sized
100	PFNonwovens a.s.	2003-11-14	2017-12-31	2017	14.3361	13.20	Textile weaving	1							0	NO	0			0	0										0		821.1			2006-12-18	11.1972		Micro-sized	Large-sized	Micro-sized	Large-sized
101	PFNonwovens a.s.	2003-11-14	2018-12-31	2018	15.35	13.20	Textile weaving	1							0	NO	0			0	0										0		806			2006-12-18	12.2111		Micro-sized	Large-sized	Micro-sized	Large-sized
102	PFNonwovens a.s.	2003-11-14	2019-12-31	2019	16.3639	13.20	Textile weaving	1							0	NO	0			0	0										0		700			2006-12-18	13.225		Micro-sized	Large-sized	Micro-sized	Large-sized
103	Philip Morris ČR a.s.	1991-03-28	1993-12-31	1993	2.80278	12.00	Production of tobacco products	1								NO																				1993-07-13	0.475		Micro-sized	Large-sized	Micro-sized	Large-sized
104	Philip Morris ČR a.s.	1991-03-28	1994-12-31	1994	3.81667	12.00	Production of tobacco products	0	8693842	28202	546812	1846506		2421520		NO		8693842	1398834			7175768	505927	7681695	1743229	932138	190877	7872572	2235	7	0	2719540	2900	7886666000	7886666	1993-07-13	1.48889	0.278533	Large-sized	Large-sized	Large-sized	Large-sized	0.200513	0.200513	0.221431	0	0.160899	0.920024	0.907155
105	Philip Morris ČR a.s.	1991-03-28	1995-12-31	1995	4.83056	12.00	Production of tobacco products	0	11098788	28047	1433797	2924569		4386413		NO		11098788	2782407			8768335	257638	9025973	3077149	1805222	228579	9254552	2149	5	0	2719540	3856	10486546240	1.04865e+07	1993-07-13	2.50278	0.395215	Large-sized	Large-sized	Large-sized	Large-sized	0.277251	0.277251	0.332501	0	0.250695	0.955894	0.944837
106	Philip Morris ČR a.s.	1991-03-28	1996-12-31	1996	5.84722	12.00	Production of tobacco products	1								NO															0					1993-07-13	3.51944		Micro-sized	Large-sized	Micro-sized	Large-sized
107	Philip Morris ČR a.s.	1991-03-28	1997-12-31	1997	6.86111	12.00	Production of tobacco products	1								NO															0					1993-07-13	4.53333		Micro-sized	Large-sized	Micro-sized	Large-sized
108	Philip Morris ČR a.s.	1991-03-28	1998-12-31	1998	7.875	12.00	Production of tobacco products	1								NO															0					1993-07-13	5.54722		Micro-sized	Large-sized	Micro-sized	Large-sized
109	Philip Morris ČR a.s.	1991-03-28	1999-12-31	1999	8.88889	12.00	Production of tobacco products	0	12097442	28886	1271839	2410273		3710998	0	NO	0	8490541	3405782	0	0	14148444	334	14148778	4273963	2842538	81276	14230054	2013	7	0	2745386	7222	19827177692	1.98272e+07	1993-07-13	6.56111	0.306759	Large-sized	Large-sized	Large-sized	Large-sized	0.353295	0.503379	0.300348	0	0.281529	1.95295	2.33521
110	Philip Morris ČR a.s.	1991-03-28	2000-12-31	2000	9.90556	12.00	Production of tobacco products	0	13084137	28874	1207015	2185579		3421468	93600	YES	0	9295605	3462072	0	0	12284795	127	12284922	4380508	3219626	249607	12534529	1578	7	93600	2745386	5751	15788714886	1.57887e+07	1993-07-13	7.57778	0.261497	Large-sized	Large-sized	Large-sized	Large-sized	0.334795	0.471245	0.349475	0.0273567	0.264601	1.50896	1.69851
111	Philip Morris ČR a.s.	1991-03-28	2001-12-31	2001	10.9194	12.00	Production of tobacco products	0	15712676	28077	1155896	2041717		3225690	398460	YES	0	10621002	5047940	0	0	13942163	1330059	15272222	5369282	3691566	136818	15409040	1772	7	398460	2745386	8282	22737286852	2.27373e+07	1993-07-13	8.59167	0.205292	Large-sized	Large-sized	Large-sized	Large-sized	0.341717	0.505534	0.34845	0.123527	0.321265	1.77327	2.14079
112	Philip Morris ČR a.s.	1991-03-28	2002-12-31	2002	11.9333	12.00	Production of tobacco products	0	16429234	27763	1073553	1855802		2957118	381001	YES	0	11338995	5043471	0	0	13696539	1566965	15263504	5710820	4093044	205254	15468758	1689	7	381001	2745386	11151	30613799286	3.06138e+07	1993-07-13	9.60556	0.179991	Large-sized	Large-sized	Large-sized	Large-sized	0.347601	0.503644	0.369184	0.128842	0.306982	2.17655	2.69987
113	Philip Morris ČR a.s.	1991-03-28	2003-12-31	2003	12.9472	12.00	Production of tobacco products	0	19573414	28009	999529	1699978		2727516	299600	YES	0	11761936	7753176	0	0	13702975	1065447	14768422	6078271	4375765	164060	14932482	1645	7	299600	2745386	15728	43179431008	4.31794e+07	1993-07-13	10.6194	0.139348	Large-sized	Large-sized	Large-sized	Large-sized	0.310537	0.516775	0.40705	0.109844	0.396107	2.60991	3.67112
114	Philip Morris ČR a.s.	1991-03-28	2004-12-31	2004	13.9639	12.00	Production of tobacco products	0	15903000	2586000	0	0		2586000	290000	YES	0	11136000	4767000	0	0	13197000	0	13197000	5232000	3716000	313000	13510000	1581	8	290000	2745386	16776	46056595536	4.60566e+07	1993-07-13	11.6361	0.162611	Large-sized	Large-sized	Large-sized	Large-sized	0.328995	0.469828	0.387269	0.112142	0.299755	3.19585	4.13583
115	Philip Morris ČR a.s.	1991-03-28	2005-12-31	2005	14.9778	12.00	Production of tobacco products	0	15881000	2631000	0	0		2631000	232000	YES	0	9463000	6418000	0	0	11790000	0	11790000	3780000	2736000	180000	11970000	1124	8	232000	2745386	18251	50106039886	5.0106e+07	1993-07-13	12.65	0.16567	Large-sized	Large-sized	Large-sized	Large-sized	0.23802	0.39945	0.315789	0.0881794	0.404131	3.55922	5.29494
116	Philip Morris ČR a.s.	1991-03-28	2006-12-31	2006	15.9917	12.00	Production of tobacco products	0	13625000	2539000	0	0		2539000	174000	YES	0	8341000	5284000	0	0	10031000	0	10031000	2572000	1906000	146000	10177000	1068	6	174000	2745386	10840	29759984240	2.976e+07	1993-07-13	13.6639	0.186349	Large-sized	Large-sized	Large-sized	Large-sized	0.188771	0.308356	0.252727	0.0685309	0.387817	2.57204	3.56792
117	Philip Morris ČR a.s.	1991-03-28	2007-12-31	2007	17.0056	12.00	Production of tobacco products	0	21043000	2231000	0	0		2231000	285000	YES	0	7952000	12382000	0	0	10369000	0	10369000	2613000	1968000	248000	10617000	1109	6	285000	2745386	7933	21779147138	2.17791e+07	1993-07-13	14.6778	0.106021	Large-sized	Large-sized	Large-sized	Large-sized	0.124174	0.328597	0.246115	0.127745	0.588414	1.68	2.73883
118	Philip Morris ČR a.s.	1991-03-28	2008-12-31	2008	18.0222	12.00	Production of tobacco products	0	12916000	2269000	0	0		2269000	248000	YES	0	8661000	4964000	0	0	9902000	0	9902000	2178000	1692000	410000	10312000	1221	6	248000	2745386	6026	16543696036	1.65437e+07	1993-07-13	15.6944	0.175674	Large-sized	Large-sized	Large-sized	Large-sized	0.168628	0.251472	0.21121	0.109299	0.38433	1.57855	1.91014
119	Philip Morris ČR a.s.	1991-03-28	2009-12-31	2009	19.0361	12.00	Production of tobacco products	0	13706000	2561000	0	0		2561000	348000	YES	0	8922000	4784000	0	0	11690000	0	11690000	3206000	2506000	234000	11924000	1197	6	348000	2745386	8796	24148415256	2.41484e+07	1993-07-13	16.7083	0.186852	Large-sized	Large-sized	Large-sized	Large-sized	0.233912	0.359336	0.26887	0.135884	0.349044	2.11093	2.70661
120	Philip Morris ČR a.s.	1991-03-28	2010-12-31	2010	20.05	12.00	Production of tobacco products	0	15741000	2752000	0	0		2752000	374000	YES	0	9177000	6564000	0	0	11402000	0	11402000	2975000	2390000	140000	11542000	1231	6	374000	2745386	10240	28112752640	2.81128e+07	1993-07-13	17.7222	0.17483	Large-sized	Large-sized	Large-sized	Large-sized	0.188997	0.32418	0.257754	0.135901	0.417	2.20296	3.06339
121	Philip Morris ČR a.s.	1991-03-28	2011-12-31	2011	21.0639	12.00	Production of tobacco products	0	17433000	2735000	0	0		2735000	308000	YES	0	8271000	9162000	0	0	12155000	0	12155000	3166000	2541000	146000	12301000	1172	6	308000	2745386	12580	34536955880	3.4537e+07	1993-07-13	18.7361	0.156886	Large-sized	Large-sized	Large-sized	Large-sized	0.18161	0.382783	0.257377	0.112614	0.525555	2.50668	4.17567
122	Philip Morris ČR a.s.	1991-03-28	2012-12-31	2012	22.0806	12.00	Production of tobacco products	0	17820000	2897000	0	0		2897000	274000	YES	0	8196000	9624000	0	0	12963000	0	12963000	3049000	2441000	187000	13150000	1100	6	274000	2745386	10700	29375630200	2.93756e+07	1993-07-13	19.7528	0.16257	Large-sized	Large-sized	Large-sized	Large-sized	0.1711	0.372011	0.231863	0.0945806	0.540067	2.18853	3.58414
123	Philip Morris ČR a.s.	1991-03-28	2013-12-31	2013	23.0944	12.00	Production of tobacco products	0	21968000	3147000	0	0		3147000	301000	YES	0	7910000	13998000	0	0	12770000	0	12770000	2783000	2227000	175000	12945000	1108	6	301000	2745386	10579	29043438494	2.90434e+07	1993-07-13	20.7667	0.143254	Large-sized	Large-sized	Large-sized	Large-sized	0.126684	0.351833	0.214986	0.0956466	0.6372	1.96464	3.67174
124	Philip Morris ČR a.s.	1991-03-28	2014-12-31	2014	24.1083	12.00	Production of tobacco products	0	12450000	3193000	0	0		3193000	293000	YES	0	7811000	4639000	0	0	14049000	0	14049000	2821000	2255000	137000	14186000	1053	5	293000	2745386	10820	29705076520	2.97051e+07	1993-07-13	21.7806	0.256466	Large-sized	Large-sized	Large-sized	Large-sized	0.226586	0.361157	0.198858	0.0917632	0.37261	2.75856	3.80298
125	Philip Morris ČR a.s.	1991-03-28	2015-12-31	2015	25.1222	12.00	Production of tobacco products	0	15054000	3915000	0	0		3915000	299000	YES	0	7956000	7098000	0	0	10866000	0	10866000	3203000	2570000	131000	10997000	1226	5	299000	2745386	11999	32941886614	3.29419e+07	1993-07-13	22.7944	0.260064	Large-sized	Large-sized	Large-sized	Large-sized	0.212767	0.402589	0.291261	0.0763729	0.471503	2.65975	4.14051
126	Philip Morris ČR a.s.	1991-03-28	2016-12-31	2016	26.1389	12.00	Production of tobacco products	0	15570000	4250000	0	0		4250000	250000	YES	0	8194000	7376000	0	0	11453000	0	11453000	3464000	2767000	41000	11494000	1148	5	250000	2745386	13096	35953575056	3.59536e+07	1993-07-13	23.8111	0.272961	Large-sized	Large-sized	Large-sized	Large-sized	0.222479	0.422748	0.301375	0.0588235	0.473732	2.78289	4.38779
127	Philip Morris ČR a.s.	1991-03-28	2017-12-31	2017	27.1528	12.00	Production of tobacco products	0	15557000	4256000	0	0		4256000	275000	YES	0	8921000	6636000	0	0	12200000	0	12200000	4331000	3484000	180000	12380000	1349	5	275000	2745386	16556	45452610616	4.54526e+07	1993-07-13	24.825	0.273575	Large-sized	Large-sized	Large-sized	Large-sized	0.278396	0.485484	0.349838	0.0646147	0.42656	3.34824	5.09501
128	Philip Morris ČR a.s.	1991-03-28	2018-12-31	2018	28.1667	12.00	Production of tobacco products	0	15956000	4177000	0	0		4177000	381000	YES	0	9797000	6159000	0	0	14082000	0	14082000	4800000	3836000	90000	14172000	1353	5	381000	2745386	14080	38655034880	3.8655e+07	1993-07-13	25.8389	0.261782	Large-sized	Large-sized	Large-sized	Large-sized	0.300827	0.489946	0.338696	0.0912138	0.385999	2.8086	3.9456
129	Philip Morris ČR a.s.	1991-03-28	2019-12-31	2019	29.1806	12.00	Production of tobacco products	0	16394000	3599000	0	0		3599000	368000	YES	0	9435000	6959000	0	0	17092000	0	17092000	5065000	4021000	113000	17205000	1367	5	368000	2745386	15280	41949498080	4.19495e+07	1993-07-13	26.8528	0.219532	Large-sized	Large-sized	Large-sized	Large-sized	0.308954	0.536831	0.294391	0.102251	0.424485	2.98332	4.44616
130	Royal Dutch Shell PLC	1991-04-26	2018-12-31	2018	28.0861	47.30	Fuel retail	0	8968292404	5013849550	0	0		5013849550	721473124	YES	0	4550128844	4418163560	371947096	349526028	8725322614	0	8725322614	800261386	537072196	91459086	8816781700	13386	12		4471889296	774	3461242315104	3.46124e+09	2018-05-22	0.619444	0.559064	Large-sized	Large-sized	Large-sized	Large-sized	0.0892323	0.175877	0.0907657	0.143896	0.492643	0.878585	0.760691
131	Royal Dutch Shell PLC	1991-04-26	2019-12-31	2019	29.1	47.30	Fuel retail	0	9146484656	5391692729	0	0		5391692729	781578171	YES	0	4308463523	4838021133	0	781578171	7801462617	0	7801462617	576496185	371708272	82001125	7883463742	13209	12		4151787517	665.6	2.76343e+12	2.76343e+09	2018-05-22	1.63333	0.589483	Large-sized	Large-sized	Large-sized	Large-sized	0.0630293	0.133806	0.0731273	0.14496	0.528949	0.831079	0.641396
132	OMV AG	1992-12-03	2018-12-31	2018	26.4556	47.30	Fuel retail	0	950821725	388833375	0	0		388833375	19782525	YES	0	394672950	249018000	2083725	17698800	589874250	0	589874250	84841050	51269925	13299825	603174075	20231	4		326651395	1271	415173923045	4.15174e+08	2018-05-22	0.619444	0.408945	Large-sized	Large-sized	Large-sized	Large-sized	0.0892292	0.214965	0.140658	0.0508766	0.261898	1.03185	1.05194
133	OMV AG	1992-12-03	2019-12-31	2019	27.4694	47.30	Fuel retail	0	1025928750	418731390	0	0		418731390	20709150	YES	0	428488830	238726950	0	20709150	596144010	0	596144010	87740730	54555270	8004150	604148160	19845	4		326610239	1346	439617381694	4.39617e+08	2018-05-22	1.63333	0.408149	Large-sized	Large-sized	Large-sized	Large-sized	0.0855232	0.204768	0.14523	0.0494569	0.232693	1.01668	1.02597
134	MOL PLC	1993-11-01	2018-12-31	2018	25.5306	47.30	Fuel retail	0	3.69618e+08	1.82283e+08	0	0		1.82283e+08	5.64721e+06	YES	0	1.85142e+08	1.84476e+08	3.6978e+06	1.94941e+06	4.14269e+08	0	4.14269e+08	2.65578e+07	2.45001e+07	3.36398e+06	4.17633e+08	2951	11		697913954	252.2	1.76014e+11	1.76014e+08	2018-05-22	0.619444	0.493165	Large-sized	Large-sized	Large-sized	Large-sized	0.0718519	0.143445	0.0635912	0.0309805	0.499099	0.975304	0.950696
135	MOL PLC	1993-11-01	2019-12-31	2019	26.5444	47.30	Fuel retail	0	3.9457e+08	2.06497e+08	0	0		2.06497e+08	1.03893e+07	YES	0	1.88461e+08	2.06109e+08	2.03025e+06	8.35901e+06	4.04907e+08	0	4.04907e+08	2.11957e+07	1.75579e+07	2.34261e+06	4.07249e+08	2851	9		704367982	218.6	1.53975e+11	1.53975e+08	2018-05-22	1.63333	0.523347	Large-sized	Large-sized	Large-sized	Large-sized	0.0537185	0.112467	0.0520461	0.0503118	0.522363	0.912598	0.817011
136	POLSKI KONCERN NAFTOWY ORLEN	1995-02-17	2018-12-31	2018	24.2167	47.30	Fuel retail	0	383563180	187712200	0	0		187712200	21539960	YES	0	2.13719e+08	169843960	1.71028e+06	19829680	656041880	0	656041880	42517800	3.35119e+07	12857000	668898880	21282	7		427709061	649.8	2.77925e+11	2.77925e+08	2018-05-22	0.619444	0.489391	Large-sized	Large-sized	Large-sized	Large-sized	0.11085	0.198942	0.0635639	0.11475	0.442806	1.16739	1.30042
137	POLSKI KONCERN NAFTOWY ORLEN	1995-02-17	2019-12-31	2019	25.2306	47.30	Fuel retail	0	425075940	216800550	0	0		216800550	23868060	YES	0	230483790	194592150	274620	23593440	663881910	0	663881910	31951440	25659060	7438620	671320530	22337	8		427709061	502.4	2.14881e+11	2.14881e+08	2018-05-22	1.63333	0.510028	Large-sized	Large-sized	Large-sized	Large-sized	0.0751664	0.138628	0.0475949	0.110092	0.457782	0.963294	0.932304
138	SKANSKA AB	2001-01-10	2019-12-31	2019	19.2472	42.11	Construction of roads and highways	0	306475776	30054656	112779136	9679360	16778368	152513152	20905472	YES	0	80307072	226168704	11226112	9679360	420361472	0	420361472	17850880	14723328	1437312	421798784	34756	8		419903072	536	225068046592	2.25068e+08	2018-05-22	1.63333	0.552381	Large-sized	Large-sized	Large-sized	Large-sized	0.0582456	0.222283	0.0423208	0.137073	0.737966	1.47234	2.80259
139	ERSTE GROUP AG	1991-12-30	2019-12-31	2019	28.4111	64.19	Other monetary intermediation	0	6.24306e+09	6.68092e+07	0	0	0	6.68092e+07	10941546	YES	0	5.20329e+08	5.72273e+09	0	0	1.40873e+08	4.2059e+07	1.82932e+08	5.91985e+07	4.856e+07	434333	1.83366e+08	50245	7		429800000	857	368338600000	368338600	2002-10-01	17.5	0.0107014	Large-sized	Large-sized	Large-sized	Large-sized	0.00948229	0.113771	0.322843	0.163773	0.916655	0.975655	0.707896
140	ERSTE GROUP AG	1991-12-30	2018-12-31	2018	27.3972	64.19	Other monetary intermediation	0	6.09147e+09	5.89821e+07	0	0	0	5.89821e+07	9.56198e+06	YES	0	4.85398e+08	5.60607e+09	0	0	1.33108e+08	4.56003e+07	178708488	6.41832e+07	5.56312e+07	337049	1.79046e+08	50153	6		429800000	747	321060600000	321060600	2002-10-01	16.4861	0.00968273	Large-sized	Large-sized	Large-sized	Large-sized	0.0105366	0.132228	0.358474	0.162117	0.920315	0.973022	0.661438
[truncated: 3 more columns]

## Sheet: Tabs
											x		y	y
											INDEPENDENT VARIABLE		DEPENDENT VARIABLE	DEPENDENT VARIABLE
Year	Total amount	Without data	Total number of companies with data	Leasing	Time	Number of years on the stock market	Assets in Place	ROA	ROE	ROS	Lease Intensity	Leverage Ratio	Tobin Q	Market to Book	Tobin Q	Tobin Q	Without leasing	Time	Number of years on the stock market	Assets in Place	ROA	ROE	ROS	Lease Intensity	Leverage Ratio	Tobin Q	Market to Book			Business name	NACE CODE	NACE classification of economic activities in the European Union (EU)	BRANCH			MARKET	RESEARCH			Total	Research	Research		BRANCH
1993	2	1	1	0	#DIV/0!	#DIV/0!	#DIV/0!	#DIV/0!	#DIV/0!	#DIV/0!	#DIV/0!	#DIV/0!	#DIV/0!	#DIV/0!	#DIV/0!		0											#DIV/0!		Kofola ČeskoSlovensko a.s.	11.07	Production of non-alcoholic beverages	Production			PRIME	Ano		PRIME	9	7	0.411765		Production	7	0.583333
1994	2	0	2	0	#DIV/0!	#DIV/0!	#DIV/0!	#DIV/0!	#DIV/0!	#DIV/0!	#DIV/0!	#DIV/0!	#DIV/0!	#DIV/0!	#DIV/0!		0											#DIV/0!		Avast Software s.r.o.	58.29	Other software releases	Services (IT, Telecommunications and Banking)			STANDARD	Ano		STANDARD	3	3	0.176471		Services (IT, Telecommunications and Banking)unikace a bankovnictví)	0	0
1995	3	1	2	0	#DIV/0!	#DIV/0!	#DIV/0!	#DIV/0!	#DIV/0!	#DIV/0!	#DIV/0!	#DIV/0!	#DIV/0!	#DIV/0!	#DIV/0!		0											#DIV/0!		ČEZ, a. s.	35.11	Electricity production	Production			PRIME	Ano		FREE	8	6	0.352941		Retail	5	0.416667
1996	3	2	1	0	#DIV/0!	#DIV/0!	#DIV/0!	#DIV/0!	#DIV/0!	#DIV/0!	#DIV/0!	#DIV/0!	#DIV/0!	#DIV/0!	#DIV/0!		0											#DIV/0!		Komerční banka, a.s.	64.19	Other monetary intermediation	Services (IT, Telecommunications and Banking)			PRIME	Ano		START	1	1	0.0588235		Construction industry	0	0
1997	3	1	2	0	#DIV/0!	#DIV/0!	#DIV/0!	#DIV/0!	#DIV/0!	#DIV/0!	#DIV/0!	#DIV/0!	#DIV/0!	#DIV/0!	#DIV/0!		0											#DIV/0!		Photon Energy N.V.	27.90	Production of electrical equipment	Production			STANDARD	Ano		Total	21	17	1		Total	12	1
1998	3	1	2	0	#DIV/0!	#DIV/0!	#DIV/0!	#DIV/0!	#DIV/0!	#DIV/0!	#DIV/0!	#DIV/0!	#DIV/0!	#DIV/0!	#DIV/0!		0											#DIV/0!		STOCK SPIRITS GROUP PLC	11.01	Distillation, rectification and mixing of spirits	Production			FREE	Ano
1999	3	0	3	0	#DIV/0!	#DIV/0!	#DIV/0!	#DIV/0!	#DIV/0!	#DIV/0!	#DIV/0!	#DIV/0!	#DIV/0!	#DIV/0!	#DIV/0!		0											#DIV/0!		O2 Czech Republic a.s.	61.20	Telecommunication networks	Services (IT, Telecommunications and Banking)			PRIME	Ano
2000	3	0	3	0	#DIV/0!	#DIV/0!	#DIV/0!	#DIV/0!	#DIV/0!	#DIV/0!	#DIV/0!	#DIV/0!	#DIV/0!	#DIV/0!	#DIV/0!		0											#DIV/0!		PFNonwovens a.s.	13.20	Textile weaving	Production			PRIME	Ano
2001	3	0	3	0	#DIV/0!	#DIV/0!	#DIV/0!	#DIV/0!	#DIV/0!	#DIV/0!	#DIV/0!	#DIV/0!	#DIV/0!	#DIV/0!	#DIV/0!		0											#DIV/0!		Philip Morris ČR a.s.	12.00	Production of tobacco products	Production			STANDARD	Ano
2002	4	0	4	0	#DIV/0!	#DIV/0!	#DIV/0!	#DIV/0!	#DIV/0!	#DIV/0!	#DIV/0!	#DIV/0!	#DIV/0!	#DIV/0!	#DIV/0!		0											#DIV/0!		CZG	25.40	Production of weapons and ammunition	Production	2020-06-01	New	PRIME	Ano
2003	4	0	4	0	#DIV/0!	#DIV/0!	#DIV/0!	#DIV/0!	#DIV/0!	#DIV/0!	#DIV/0!	#DIV/0!	#DIV/0!	#DIV/0!	#DIV/0!		0											#DIV/0!		PILULKA LÉKÁRNY	47.73	Pharmaceutical retail	Retail	2020-10-26	New	START	Ano
2004	4	0	4	0	#DIV/0!	#DIV/0!	#DIV/0!	#DIV/0!	#DIV/0!	#DIV/0!	#DIV/0!	#DIV/0!	#DIV/0!	#DIV/0!	#DIV/0!		0											#DIV/0!		SKANSKA	42.11	Construction of roads and highways	Stavebnictví	2018-05-22	Není pramen + malý objem	FREE	Ano
2005	4	0	4	0	#DIV/0!	#DIV/0!	#DIV/0!	#DIV/0!	#DIV/0!	#DIV/0!	#DIV/0!	#DIV/0!	#DIV/0!	#DIV/0!	#DIV/0!		0											#DIV/0!		Royal Dutch Shell PLC	47.30	Fuel retail	Retail	2018-05-22	Silná matka	FREE	Ano
2006	5	1	4	0	#DIV/0!	#DIV/0!	#DIV/0!	#DIV/0!	#DIV/0!	#DIV/0!	#DIV/0!	#DIV/0!	#DIV/0!	#DIV/0!	#DIV/0!		0											#DIV/0!		MOL PLC	47.30	Fuel retail	Retail	2018-05-22	Silná matka	FREE	Ano
2007	5	1	4	0	#DIV/0!	#DIV/0!	#DIV/0!	#DIV/0!	#DIV/0!	#DIV/0!	#DIV/0!	#DIV/0!	#DIV/0!	#DIV/0!	#DIV/0!		0											#DIV/0!		OMV AG	47.30	Fuel retail	Retail	2018-05-22	Silná matka	FREE	Ano
2008	5	1	4	0	#DIV/0!	#DIV/0!	#DIV/0!	#DIV/0!	#DIV/0!	#DIV/0!	#DIV/0!	#DIV/0!	#DIV/0!	#DIV/0!	#DIV/0!		0											#DIV/0!		POLSKI KONCERN NAFTOWY ORLEN	47.30	Fuel retail	Retail	2018-05-22	Silná matka	FREE	Ano
2009	5	1	4	0	#DIV/0!	#DIV/0!	#DIV/0!	#DIV/0!	#DIV/0!	#DIV/0!	#DIV/0!	#DIV/0!	#DIV/0!	#DIV/0!	#DIV/0!		0											#DIV/0!		ERSTE GROUP AG	64.19	Other monetary intermediation	Services (IT, Telecommunications and Banking)		Bank	PRIME	Ano
2010	5	1	4	0	#DIV/0!	#DIV/0!	#DIV/0!	#DIV/0!	#DIV/0!	#DIV/0!	#DIV/0!	#DIV/0!	#DIV/0!	#DIV/0!	#DIV/0!		0											#DIV/0!		MONETA MONEY BANK					Banka	PRIME	Ne
2011	5	1	4	0	#DIV/0!	#DIV/0!	#DIV/0!	#DIV/0!	#DIV/0!	#DIV/0!	#DIV/0!	#DIV/0!	#DIV/0!	#DIV/0!	#DIV/0!		0											#DIV/0!		VIG					Banka	PRIME	Ne
2012	5	1	4	0	#DIV/0!	#DIV/0!	#DIV/0!	#DIV/0!	#DIV/0!	#DIV/0!	#DIV/0!	#DIV/0!	#DIV/0!	#DIV/0!	#DIV/0!		0											#DIV/0!		DEUTSCHE BANK					Banka	FREE	Ne
2013	6	1	5	0	#DIV/0!	#DIV/0!	#DIV/0!	#DIV/0!	#DIV/0!	#DIV/0!	#DIV/0!	#DIV/0!	#DIV/0!	#DIV/0!	#DIV/0!		0											#DIV/0!		PKO BANK POLSKI					Banka	FREE	Ne
2014	6	1	5	0	#DIV/0!	#DIV/0!	#DIV/0!	#DIV/0!	#DIV/0!	#DIV/0!	#DIV/0!	#DIV/0!	#DIV/0!	#DIV/0!	#DIV/0!		0											#DIV/0!
2015	7	1	6	0	#DIV/0!	#DIV/0!	#DIV/0!	#DIV/0!	#DIV/0!	#DIV/0!	#DIV/0!	#DIV/0!	#DIV/0!	#DIV/0!	#DIV/0!		0											#DIV/0!
2016	8	1	7	0	#DIV/0!	#DIV/0!	#DIV/0!	#DIV/0!	#DIV/0!	#DIV/0!	#DIV/0!	#DIV/0!	#DIV/0!	#DIV/0!	#DIV/0!		0											#DIV/0!
2017	8	1	7	0	#DIV/0!	#DIV/0!	#DIV/0!	#DIV/0!	#DIV/0!	#DIV/0!	#DIV/0!	#DIV/0!	#DIV/0!	#DIV/0!	#DIV/0!		0											#DIV/0!
2018	14	1	13	0	#DIV/0!	#DIV/0!	#DIV/0!	#DIV/0!	#DIV/0!	#DIV/0!	#DIV/0!	#DIV/0!	#DIV/0!	#DIV/0!	#DIV/0!		0											#DIV/0!
2019	15	1	14	0	#DIV/0!	#DIV/0!	#DIV/0!	#DIV/0!	#DIV/0!	#DIV/0!	#DIV/0!	#DIV/0!	#DIV/0!	#DIV/0!	#DIV/0!		0											#DIV/0!
Average	140	20	120	0	#DIV/0!	#DIV/0!	#DIV/0!	#DIV/0!	#DIV/0!	#DIV/0!	#DIV/0!	#DIV/0!	#DIV/0!	#DIV/0!	#DIV/0!	#DIV/0!	0	#DIV/0!	#DIV/0!	#DIV/0!	#DIV/0!	#DIV/0!	#DIV/0!		#DIV/0!	#DIV/0!	#DIV/0!	#DIV/0!	#DIV/0!	#DIV/0!
				0													0
